# Supplementary material for: Non-Secreted Clusterin Isoforms Are Translated in Rare Amounts from Distinct Human mRNA Variants and Do Not Affect Bax-Mediated Apoptosis or the NF-κB Signaling Pathway
Source: PubMed Central journal article supplement (PMC3779157; doi:10.1371/journal.pone.0075303), 2013-09-20

**A**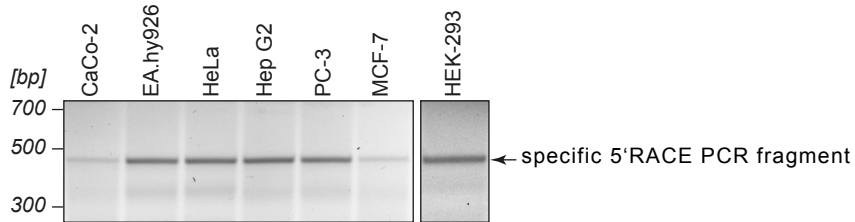

→ determined canonical transcription start

NM\_001831.3 ...AGCGC[TATAAATA]CGGCGCTCCAGTGCCACAAACGCGCGTCGCCAGGAGAGCGCGCGGGCACAGGGTGCCGCTGACCGAGGCGTGA...  
 NM\_001831.1 -----GCGGCTGACCGAGGCGTGA...  
 BP211675 -----GCGGCGTCGCCAGGAGAGCGCGCGGGCACAGGGTGCCGCTGACCGAGGCGTGA...  
 BC010514.1 -----CGCCAGGAGAGCGCGCGGGCACAGGGTGCCGCTGACCGAGGCGTGA...  
 5' RACE -----GGGGGGGGGGGGGGGGCGGCGTCGCCAGGAGAGCGCGCGGGCACAGGGTGCCGCTGACCGAGGCGTGA...  
 5' RACE-primer (AUAP)

**B**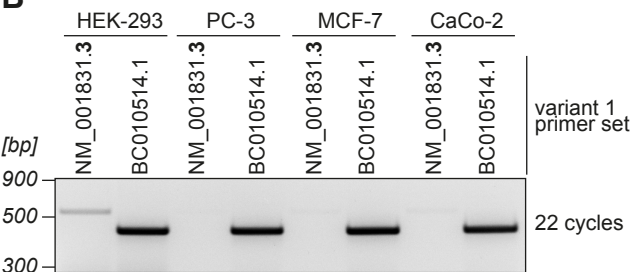**D**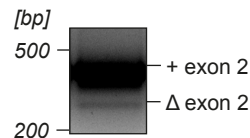**C**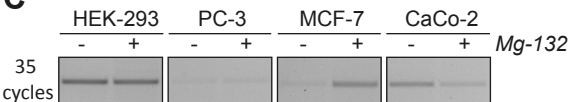**E**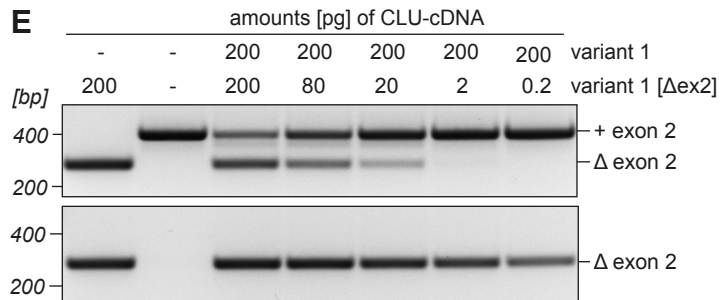

Supplement: pone.0075303.s001.pdf [file pone.0075303.s001.pdf]
