# Supplementary material for: Non-Secreted Clusterin Isoforms Are Translated in Rare Amounts from Distinct Human mRNA Variants and Do Not Affect Bax-Mediated Apoptosis or the NF-κB Signaling Pathway
Source: PubMed Central journal article supplement (PMC3779157; doi:10.1371/journal.pone.0075303), 2013-09-20

variant 1

sCLU / CLU<sub>1-449</sub>variant 1 [ $\Delta$ ex2]CLU<sub>21-449</sub>CLU<sub>34-449</sub>

control

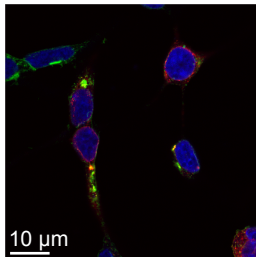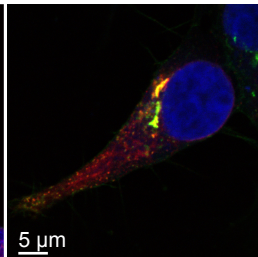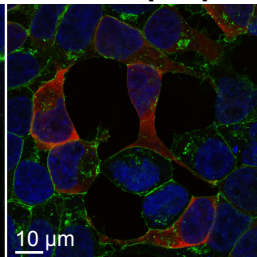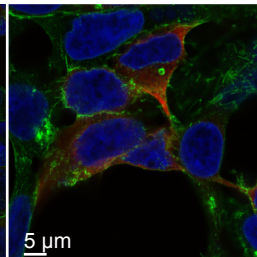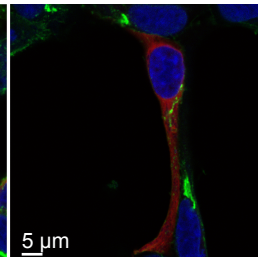

MG-132

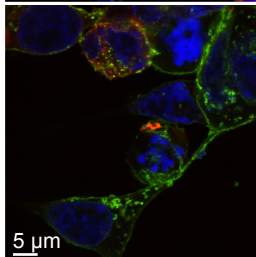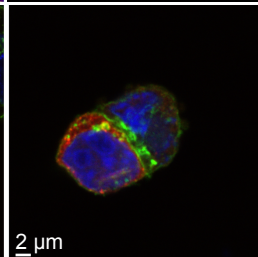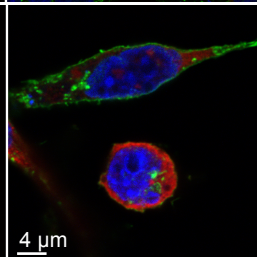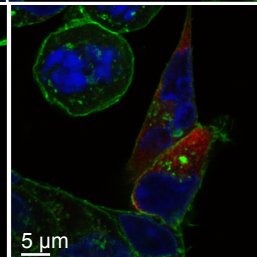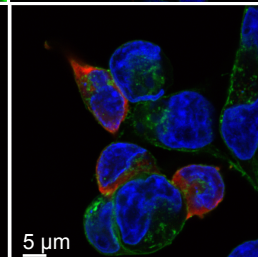

Supplement: pone.0075303.s003.pdf [file pone.0075303.s003.pdf]
