# Supplementary material for: Non-Secreted Clusterin Isoforms Are Translated in Rare Amounts from Distinct Human mRNA Variants and Do Not Affect Bax-Mediated Apoptosis or the NF-κB Signaling Pathway
Source: PubMed Central journal article supplement (PMC3779157; doi:10.1371/journal.pone.0075303), 2013-09-20

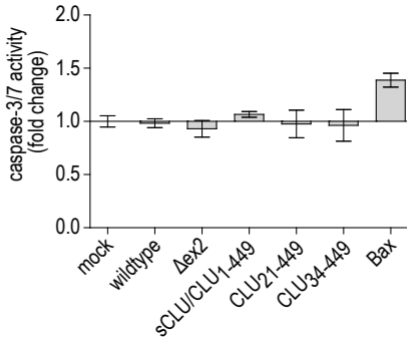

Supplement: pone.0075303.s004.pdf [file pone.0075303.s004.pdf]
